# Supplementary material for: Halogen-free ammonium–organoborate ionic liquids as lubricating additives: the effect of alkyl chain lengths on the tribological performance
Source: Royal Society of Chemistry journal article supplement (doi:10.1039/c5nj02225h), 2016-01-01
Supplement: c5nj02225h1.pdf [file c5nj02225h1.pdf]

## Supporting Information

### **Halogen- free ammonium- organoborate ionic liquids as lubricating additives: effect of alkyl chain lengths on the tribological performance**

**Praveen K. Khatri,<sup>a</sup> Chetan Joshi,<sup>a</sup> Gananath D. Thakre<sup>b\*</sup> and Suman L. Jain<sup>a\*</sup>**

<sup>a</sup>Chemical Sciences Division, CSIR-Indian Institute of Petroleum, Mohkampur, Dehradun-248005

<sup>b</sup>Tribology & Combustion Division, CSIR-Indian Institute of Petroleum, Mohkampur, Dehradun-248005 (India)

\*Email: [suman@iip.res.in](mailto:suman@iip.res.in); [gdthakre@iip.res.in](mailto:gdthakre@iip.res.in)

---

### Characterization of ammonium organoborate ionic liquids

**Table S1: Elemental analysis data of synthesized ionic liquids**

| Ionic liquid  | C (% wt)      | H(% wt)     | N(% wt)     |
|---------------|---------------|-------------|-------------|
| [N4444] MAB]  | 57.73 (57.77) | 8.87 (8.82) | 3.01 (3.06) |
| [N4444] [SAB] | 59.22 (59.38) | 9.11 (9.14) | 2.92 (2.89) |
| [N4444] [GAB] | 61.08 (60.82) | 9.36 (9.42) | 2.76 (2.73) |
| [N4444] [AAB] | 62.14 (62.10) | 9.84 (9.68) | 2.48 (2.59) |

\*values in parenthesis are calculated values

**Table S2: <sup>1</sup>H NMR data of synthesized ionic liquids**

| Ionic liquid  | Physical Appearance        | Yield (%) | <sup>1</sup> H NMR data (ppm)                                                                                                                                                                                                                                                                                              | <sup>13</sup> C NMR data (ppm)                                                                                                                                                                                                                                                                                                  |
|---------------|----------------------------|-----------|----------------------------------------------------------------------------------------------------------------------------------------------------------------------------------------------------------------------------------------------------------------------------------------------------------------------------|---------------------------------------------------------------------------------------------------------------------------------------------------------------------------------------------------------------------------------------------------------------------------------------------------------------------------------|
| [N4444] [MAB] | viscous pale yellow liquid | 95        | 0.99(t, CH <sub>3</sub> ), 1.46 (sex, CH <sub>3</sub> CH <sub>2</sub> ), 1.65 (quin, CH <sub>3</sub> CH <sub>2</sub> CH <sub>2</sub> ), 3.3 (t, -CH <sub>2</sub> N), 3.52 (s, -COCH <sub>2</sub> CO)                                                                                                                       | 13.69 (CH <sub>3</sub> ), 19.73 (CH <sub>3</sub> CH <sub>2</sub> ), 24.07 (CH <sub>3</sub> CH <sub>2</sub> CH <sub>2</sub> ), 39.20 (-COCH <sub>2</sub> CO), 58.95 (CH <sub>2</sub> N), 174.88 (C=O)                                                                                                                            |
| [N4444] [SAB] | viscous colourless liquid  | 97        | 1.01(t, CH <sub>3</sub> ), 1.46 (sex, CH <sub>3</sub> CH <sub>2</sub> ), 1.68 (quin, CH <sub>3</sub> CH <sub>2</sub> CH <sub>2</sub> ), 3.36 (t, -CH <sub>2</sub> N), 2.585 (s, -COCH <sub>2</sub> CH <sub>2</sub> CO)                                                                                                     | 13.74 (CH <sub>3</sub> ), 19.76(CH <sub>3</sub> CH <sub>2</sub> ), 24.17 (CH <sub>3</sub> CH <sub>2</sub> CH <sub>2</sub> ), 36.20 (-COCH <sub>2</sub> CH <sub>2</sub> CO), 59.00 (CH <sub>2</sub> N), 175.11(C=O)                                                                                                              |
| [N4444] [GAB] | viscous colourless liquid  | 96        | 1.00(t, CH <sub>3</sub> ), 1.45 (sex, CH <sub>3</sub> CH <sub>2</sub> ), 1.67 (quin, CH <sub>3</sub> CH <sub>2</sub> CH <sub>2</sub> +COCH <sub>2</sub> CH <sub>2</sub> CH <sub>2</sub> CO), 3.33 (t, -CH <sub>2</sub> N), 2.45 (t, -COCH <sub>2</sub> CH <sub>2</sub> CH <sub>2</sub> CO)                                 | 13.70 (CH <sub>3</sub> ), 19.73(CH <sub>3</sub> CH <sub>2</sub> ), 19.91 (COCH <sub>2</sub> CH <sub>2</sub> CH <sub>2</sub> CO)24.07 (CH <sub>3</sub> CH <sub>2</sub> CH <sub>2</sub> ), 33.22 (-COCH <sub>2</sub> CH <sub>2</sub> CH <sub>2</sub> CO), 58.93 (CH <sub>2</sub> N), 176.87(C=O)                                  |
| [N4444] [AAB] | viscous colourless liquid  | 94        | 1.01(t, CH <sub>3</sub> ), 1.45 (sex, CH <sub>3</sub> CH <sub>2</sub> ), 1.69 (quin, CH <sub>3</sub> CH <sub>2</sub> CH <sub>2</sub> +COCH <sub>2</sub> CH <sub>2</sub> CH <sub>2</sub> CH <sub>2</sub> CO), 3.37 (t, -CH <sub>2</sub> N), 2.41 (t, -COCH <sub>2</sub> (CH <sub>2</sub> ) <sub>2</sub> CH <sub>2</sub> CO) | 13.74 (CH <sub>3</sub> ), 19.78(CH <sub>3</sub> CH <sub>2</sub> ), 24.19 (CH <sub>3</sub> CH <sub>2</sub> CH <sub>2</sub> ), 24.52 (COCH <sub>2</sub> CH <sub>2</sub> CH <sub>2</sub> CH <sub>2</sub> CO) 34.49 (-COCH <sub>2</sub> CH <sub>2</sub> CH <sub>2</sub> CH <sub>2</sub> CO), 59.05 (CH <sub>2</sub> N), 175.88(C=O) |

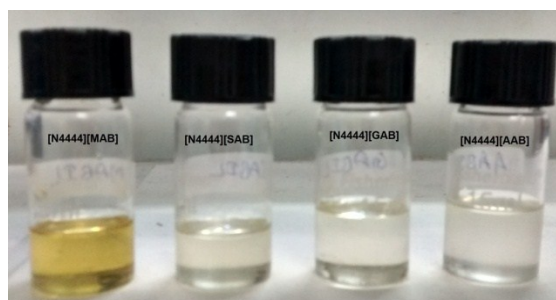**Figure S1: Physical appearance of the synthesized ILs**

**Fig. S2-S5: DSC patterns of synthesized organoborate ionic liquids**

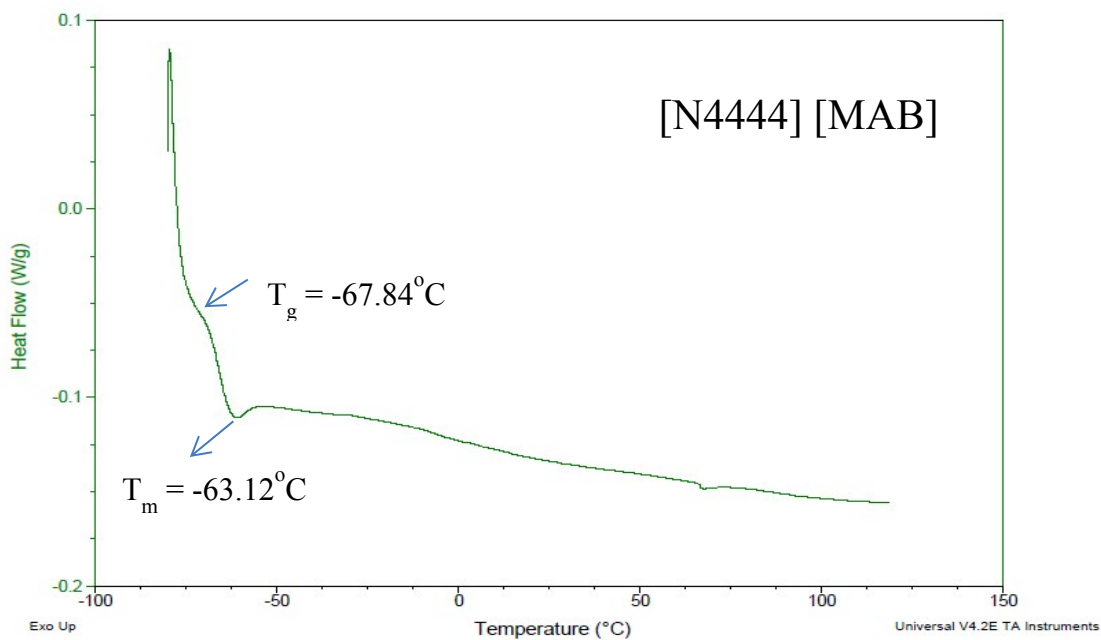

**Fig. S2: DSC curve of ionic liquid [N4444][MAB]**

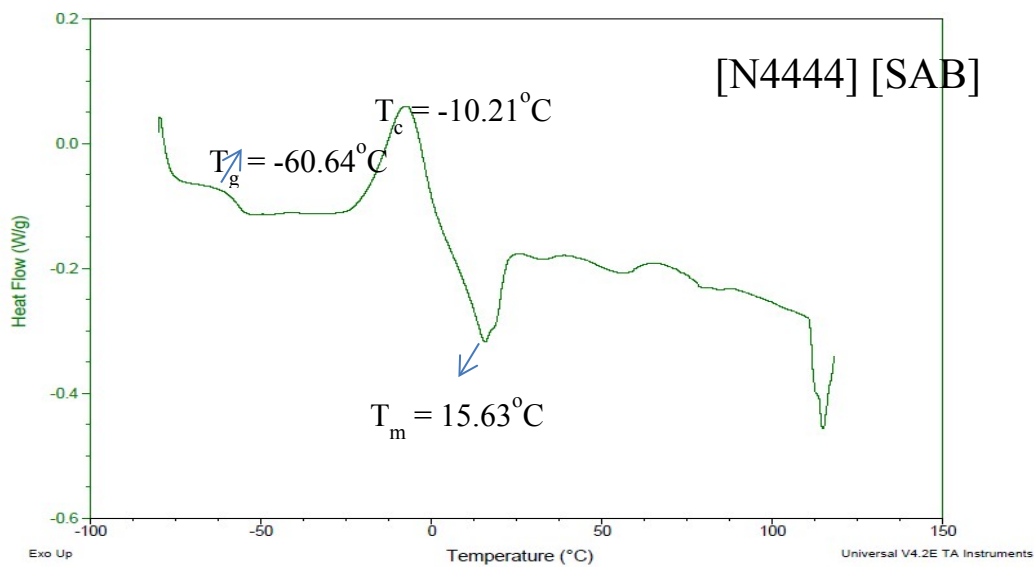

**Fig. S3: DSC curve of ionic liquid [N4444][SAB]**

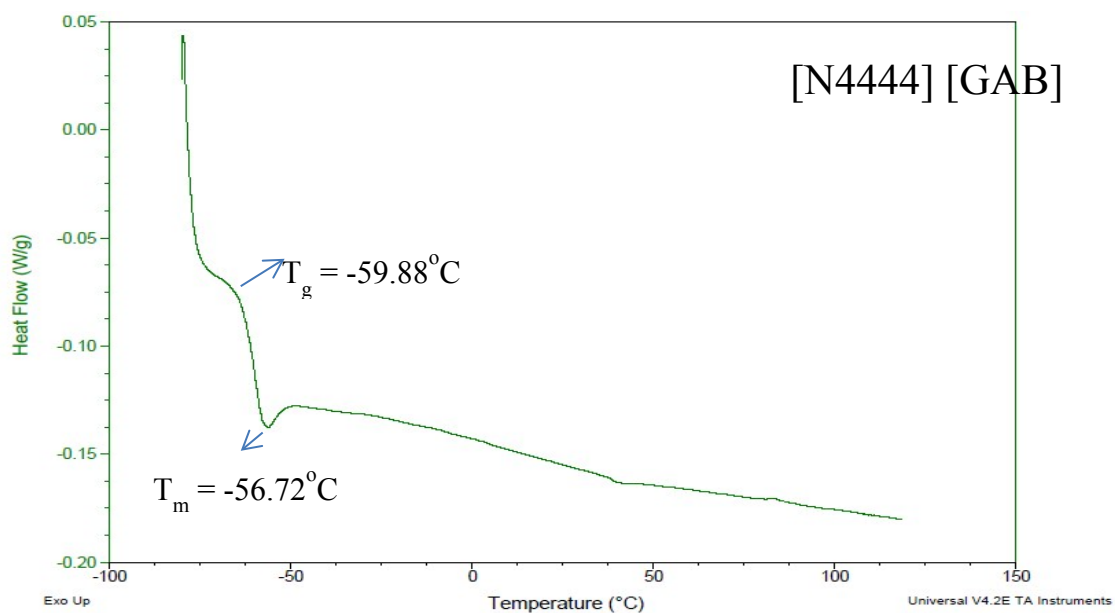

**Fig. S4:** DSC curve of ionic liquid [N4444][GAB]

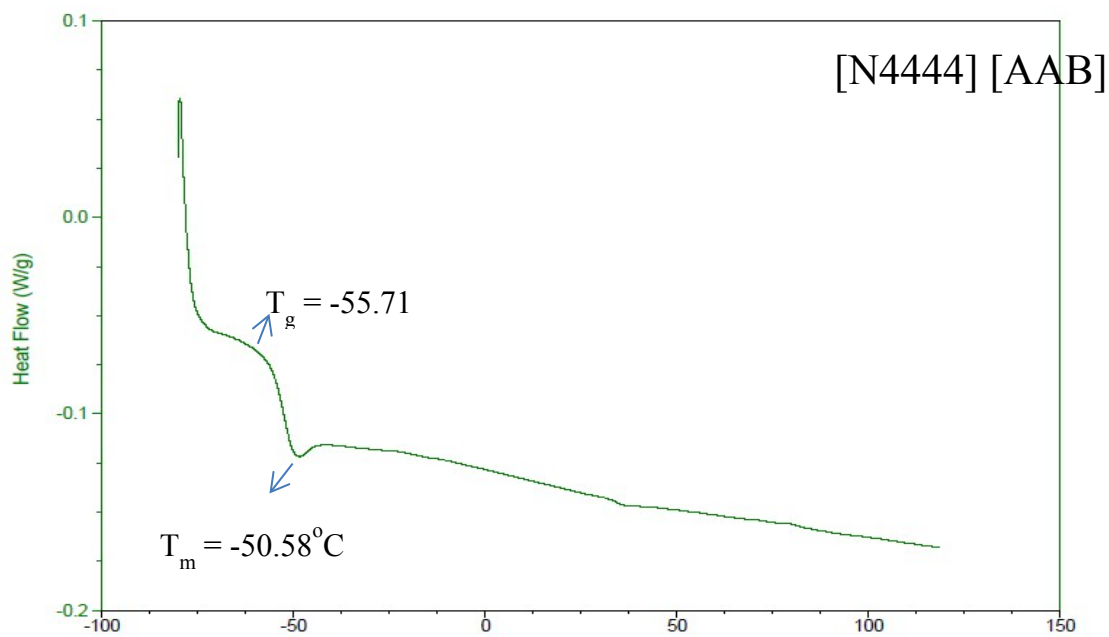

**Fig. S5:** DSC curve of ionic liquid [N4444][AAB]
